# Supplementary material for: Microglial Pro-Inflammatory and Anti-Inflammatory Phenotypes Are Modulated by Translocator Protein Activation
Source: PubMed Central journal article supplement (PMC6770267; doi:10.3390/ijms20184467), 2019-09-10
Supplement: ijms-20-04467-s001.pdf [file ijms-20-04467-s001.pdf]

## SUPPLEMENTARY DATA

**Table S1.** The table shows extracted p-values, Matrix IDs, Matrix names, and calculated 'corrected P\_values' from the normalization file. The ranking is sorted from the lowest to the highest p-value, thus from the most probable to the less one. Data were obtained from the TRANSFAC database of transcription factors (<http://transfac.gbf.de/TRANSFAC/>).

| <b>Rank</b> | <b>p-value</b>      | <b>Matrix_ID</b> | <b>Matrix_name</b> |
|-------------|---------------------|------------------|--------------------|
| 1           | 0.00682155638995285 | M00194           | V\$NFKB_Q6         |
| 2           | 0.0109640281198492  | M00261           | V\$OLF1_01         |
| 3           | 0.0166106667846406  | M00975           | V\$RFX_Q6          |
| 4           | 0.0181658475001706  | M00373           | V\$PAX4_01         |
| 5           | 0.0188015474876627  | M00931           | V\$SP1_Q6_01       |
| 6           | 0.0193288686250781  | M00255           | V\$GC_01           |
| 7           | 0.02031157683588    | M01142           | V\$LRH1_Q5         |
| 8           | 0.0207937402731656  | M01119           | V\$KAISO_01        |
| 9           | 0.0251588525533654  | M01119           | V\$KAISO_01        |
| 10          | 0.0264585494546445  | M00196           | V\$SP1_Q6          |
